# Supplementary material
Source: PubMed Central journal article supplement (PMC3360953)
Supplement: NIHMS365201-supplement-1_si_001.pdf [file NIHMS365201-supplement-1_si_001.pdf]

Supporting information for: Hypoxia-selective, enzymatic conversion of  
6-nitroquinoline into a fluorescent helicene:  
pyrido[3,2-*f*]quinolino[6,5-*c*]cinnoline 3-oxide

Anuruddha Rajapakse<sup>§</sup> and Kent S. Gates<sup>§,†,\*</sup>

<sup>§</sup>Department of Chemistry, University of Missouri, Columbia, MO 65211

<sup>†</sup>Department of Biochemistry, University of Missouri, Columbia, MO 65211

E-mail: gatesk@missouri.edu, Ph: (573) 882-6763

**Table of Contents**

|                                                                                                                   |    |
|-------------------------------------------------------------------------------------------------------------------|----|
| Figure S1. LC/MS analysis of 6-aminoquinoline <b>2</b> .....                                                      | 3  |
| Figure S2. Fluorescence spectra of NADPH and evidence that residual NADPH is consumed during reaction workup..... | 4  |
| NMR spectra 1,2-di(quinolin-6-yl)diazene oxide ( <b>3</b> ).....                                                  | 5  |
| 1D- and 2D-NMR spectra of <b>4</b> .....                                                                          | 9  |
| Spectroscopic characterization of enzymatically-generated <b>4</b> .....                                          | 17 |

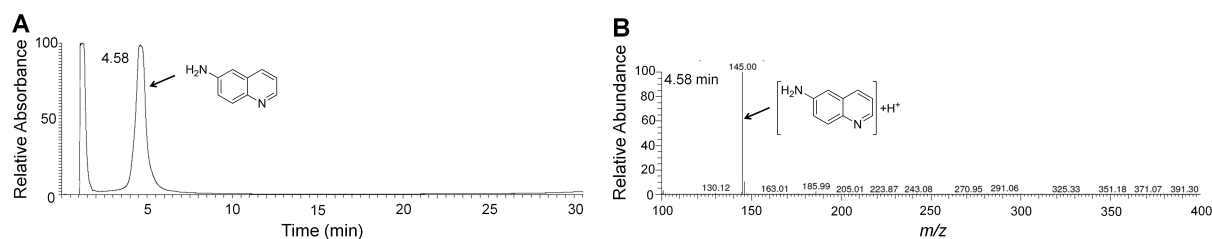

**Figure S1.** LC/MS analysis of 6-aminoquinoline (**2**). (A) UV chromatogram of **2**. (B) LC/MS analysis of the product eluting 4.6 min in the chromatogram.

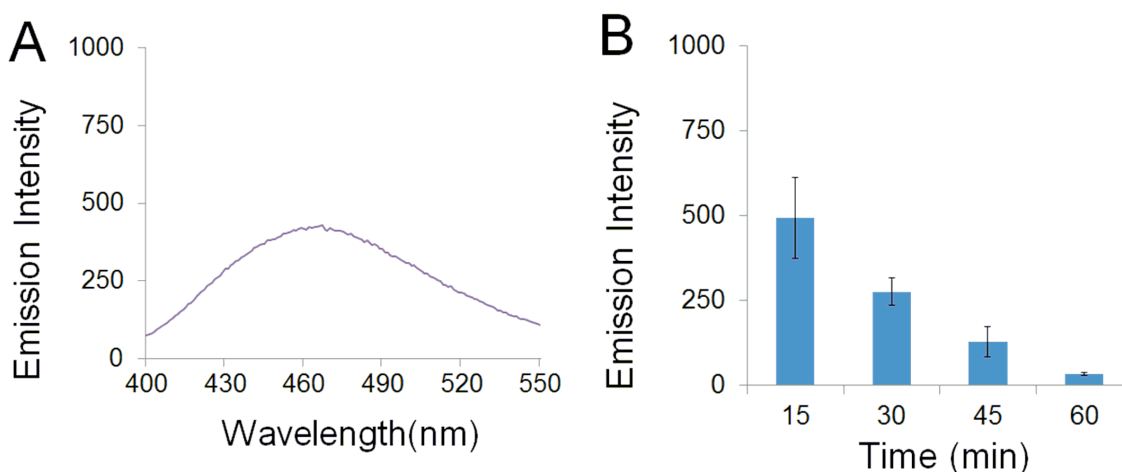

**Figure S2.** Fluorescence spectra of NADPH and evidence that residual NADPH is consumed during reaction workup. (A) Fluorescence spectrum of NADPH (50  $\mu$ M,  $\lambda_{\text{ex}}$  307 nm, in sodium phosphate buffer, 12 mM, pH 7.4). Note that the shape of the fluorescence emission peak generated by NADPH is different from that for **4** shown in the manuscript. (B) Control reactions showing that NADPH fluorescence diminishes over the course of 1 h under our typical workup conditions. Reactions containing **1** (0.8 mM), NADPH:cytochrome P450 reductase (1.1 U/mL), and NADPH (3 mM) in sodium phosphate buffer, 10 mM, pH 7.4 ( $\lambda_{\text{ex}}$  307 nm,  $\lambda_{\text{em}}$  460 nm) were incubated for various times before fluorescence analysis. This control experiment provides additional evidence that fluorescence detected in the metabolism of **1** is *not* due to residual NADPH.

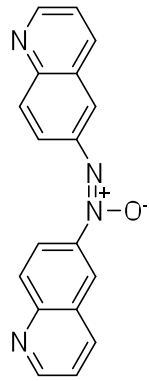

<sup>1</sup>H NMR

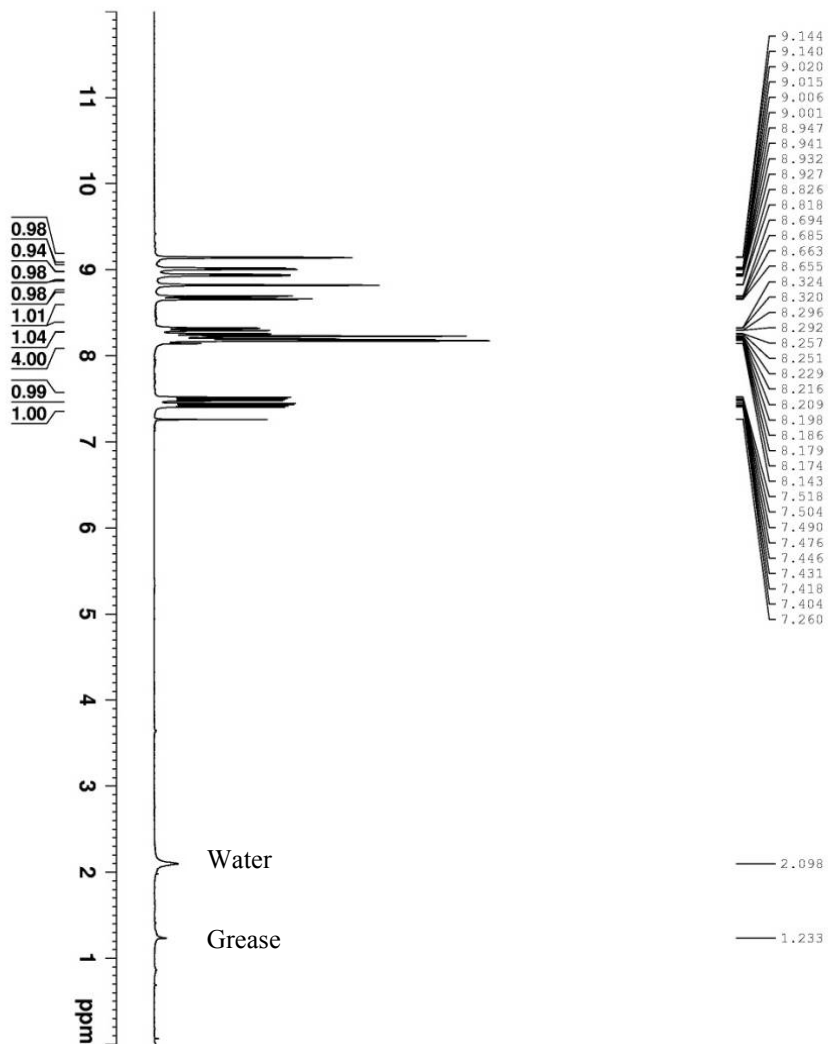

```

Current Data Parameters
NAME      Anuar39g16
EXPNO     1
PROCNO    1
F2 - Acquisition Parameters
Date_     20090923
Time      08:40
INSTRUM   D9X40
PROBHD    5 mm Multinuc1
PULPROG   zg30pad
TD         32768
SOLVENT   CDCl3
NS         1
DS         2
SWH        6172.839 Hz
FIDRES     0.188380 Hz
AQ         2.6542580 sec
RG         327.03
DQ         8.403 usec
DE         6.00 usec
TE         300.0 K
D1         1.00000000 sec
D31        0.00000000 sec

===== CHANNEL f1 =====
NUC1       1H
P1         7.05 usec
PL1        0.00 dB
SFO1       300.1318534 MHz

F2 - Processing parameters
SI         32768
SF         300.1300062 MHz
WDW        EM
SSB        0
LB         0.30 Hz
GB         0
PC         1.30
  
```

Figure S3. <sup>1</sup>H NMR of **3** (CDCl<sub>3</sub>, 300 MHz).

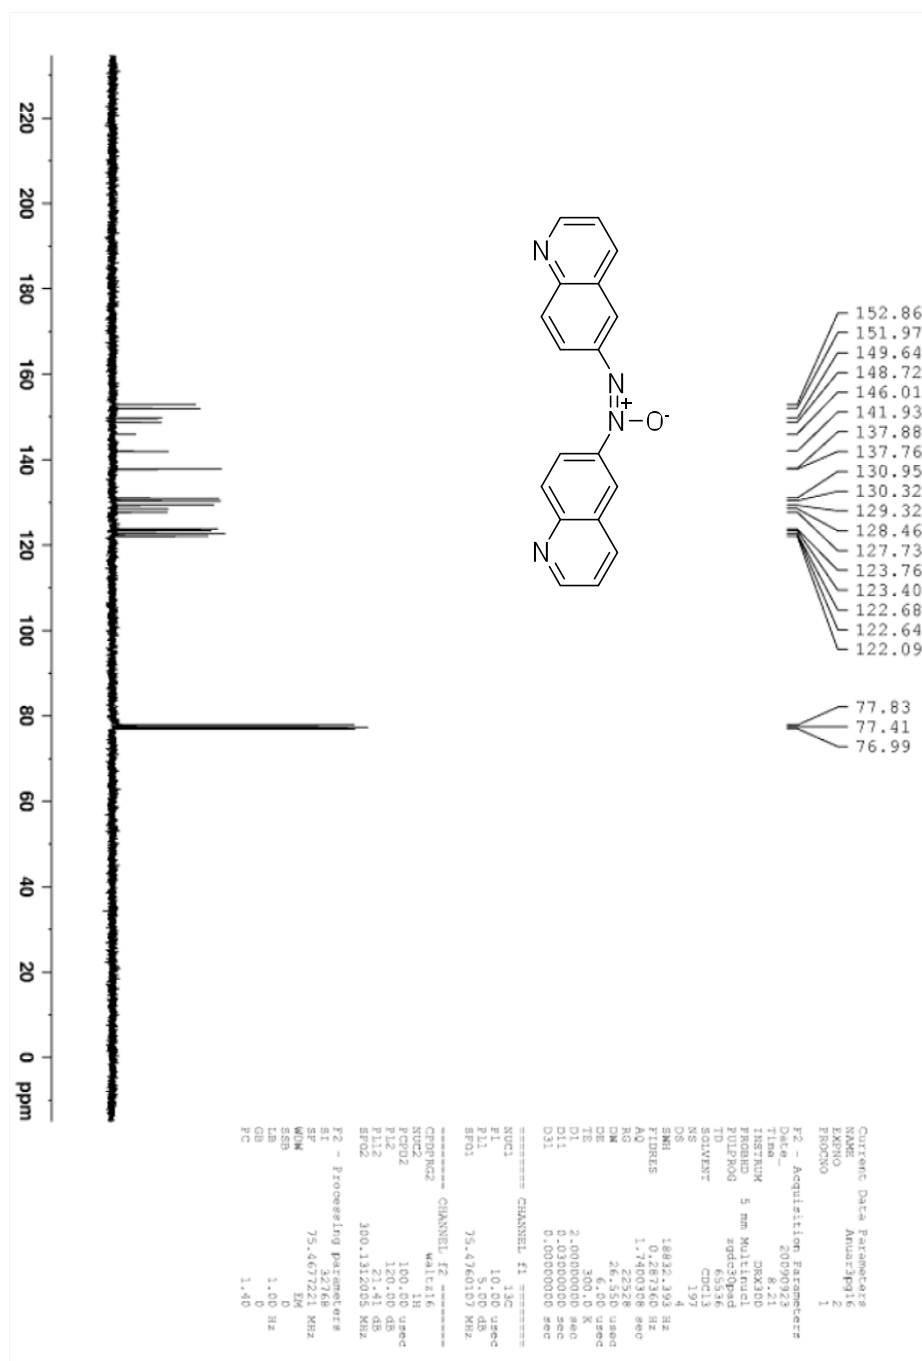

Figure S4. <sup>13</sup>C NMR of 3 (CDCl<sub>3</sub>, 125 MHz).

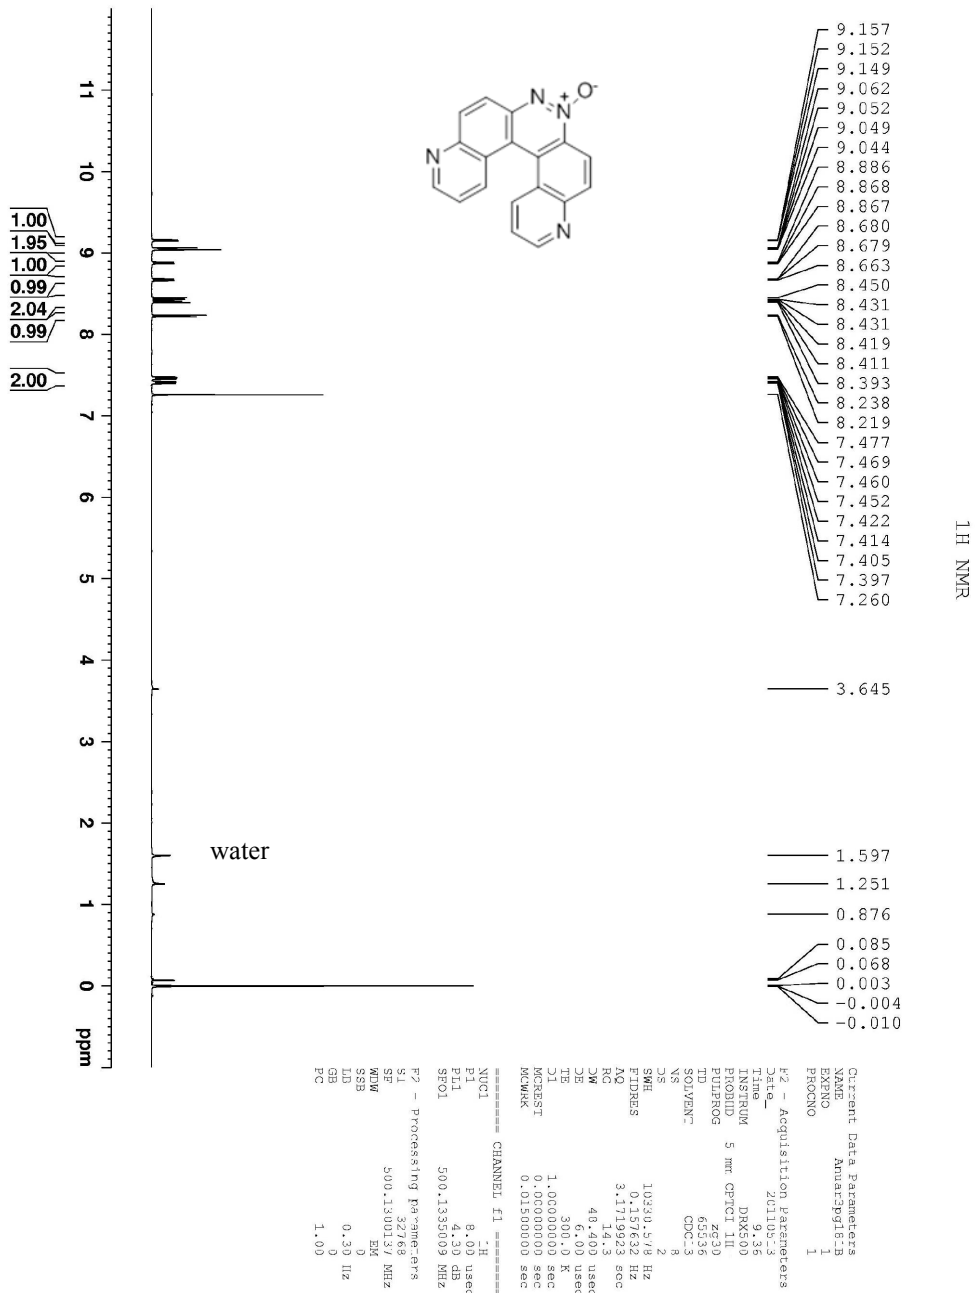

Figure S5. <sup>1</sup>H NMR of 4 (CDCl<sub>3</sub>, 500 MHz).

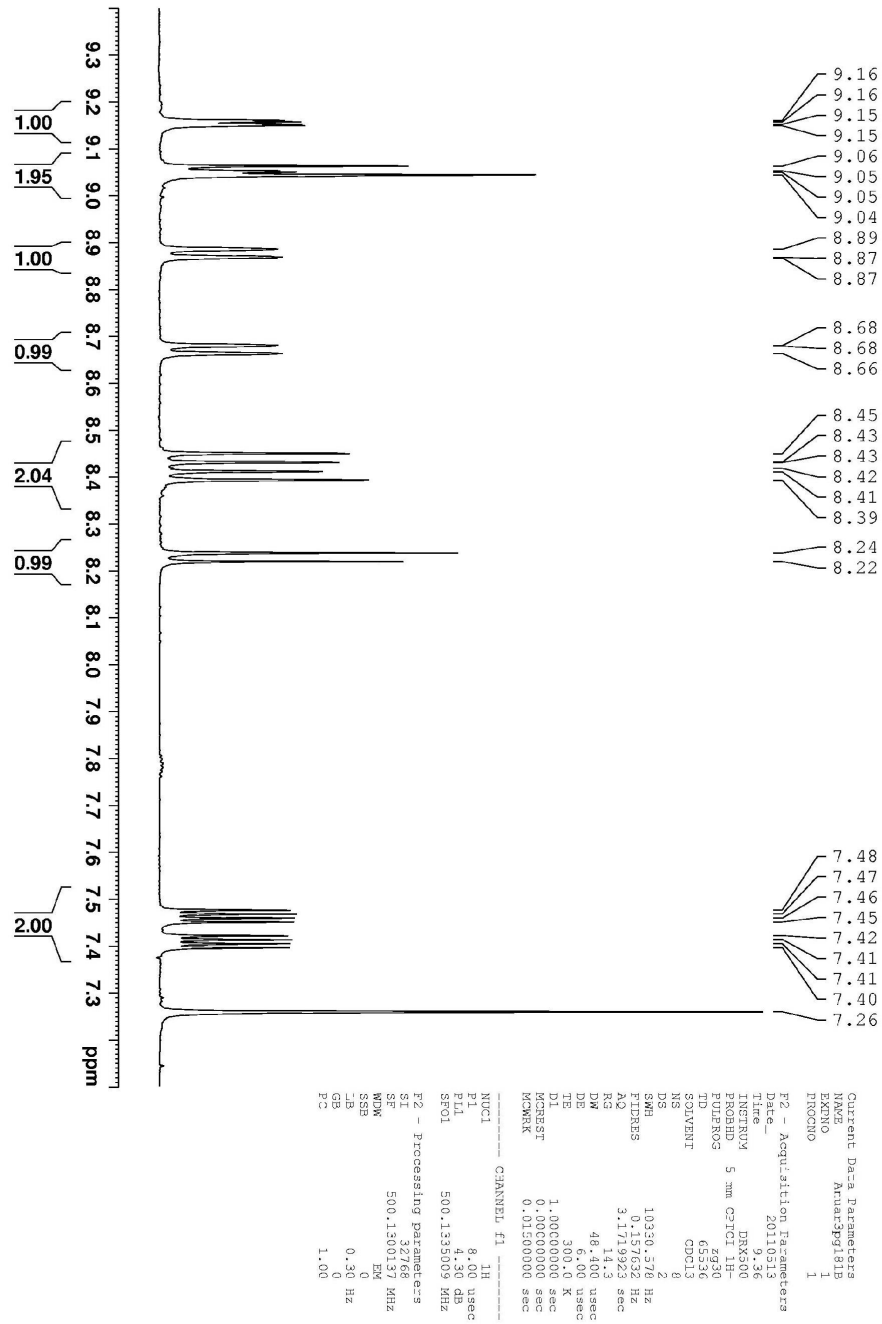

Figure S6. <sup>1</sup>H NMR of 4, aromatic region (CDCl<sub>3</sub>, 500 MHz).

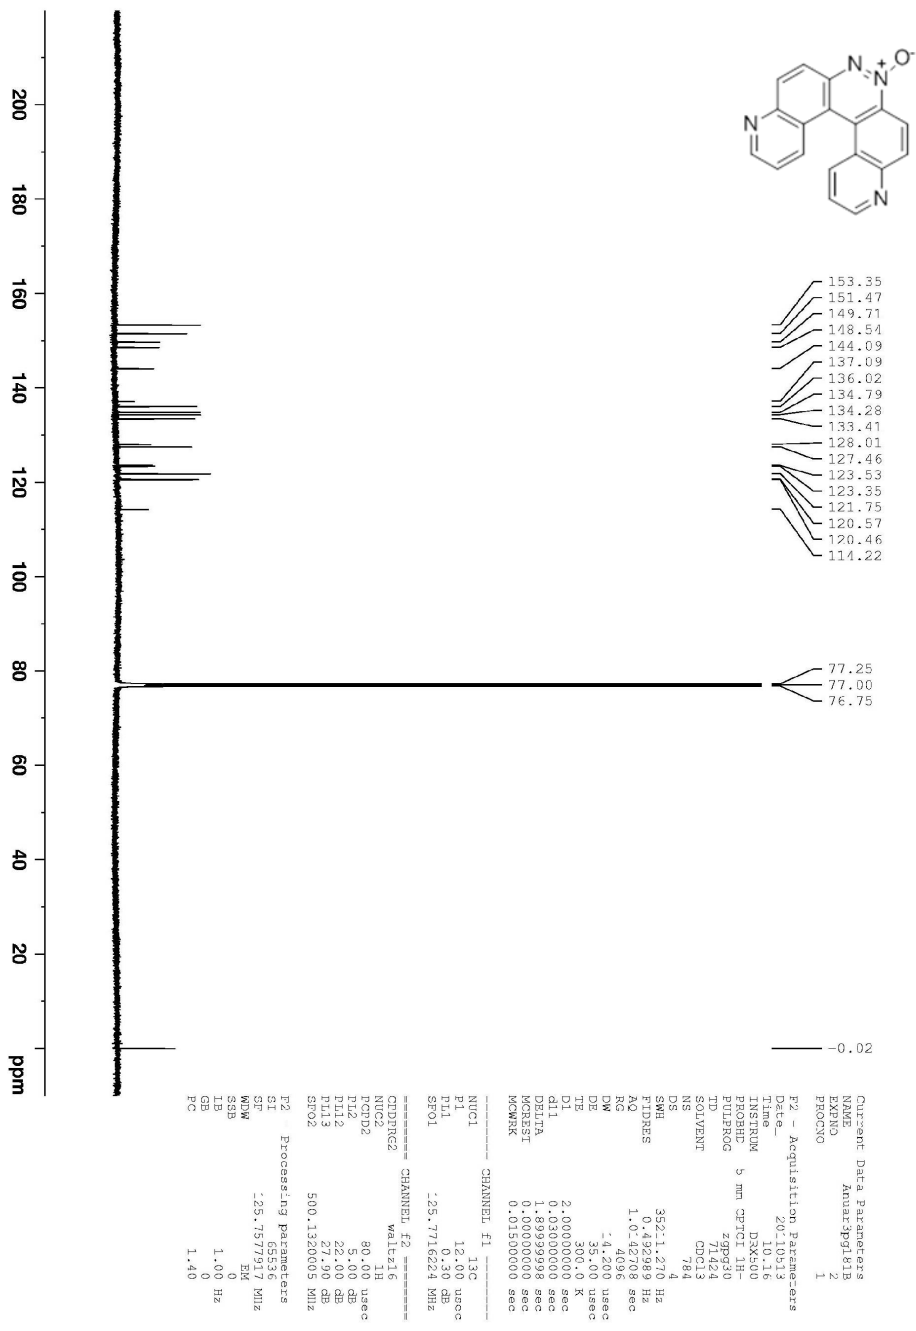

Figure S7. <sup>13</sup>C NMR of 4 (CDCl<sub>3</sub>, 125 MHz).

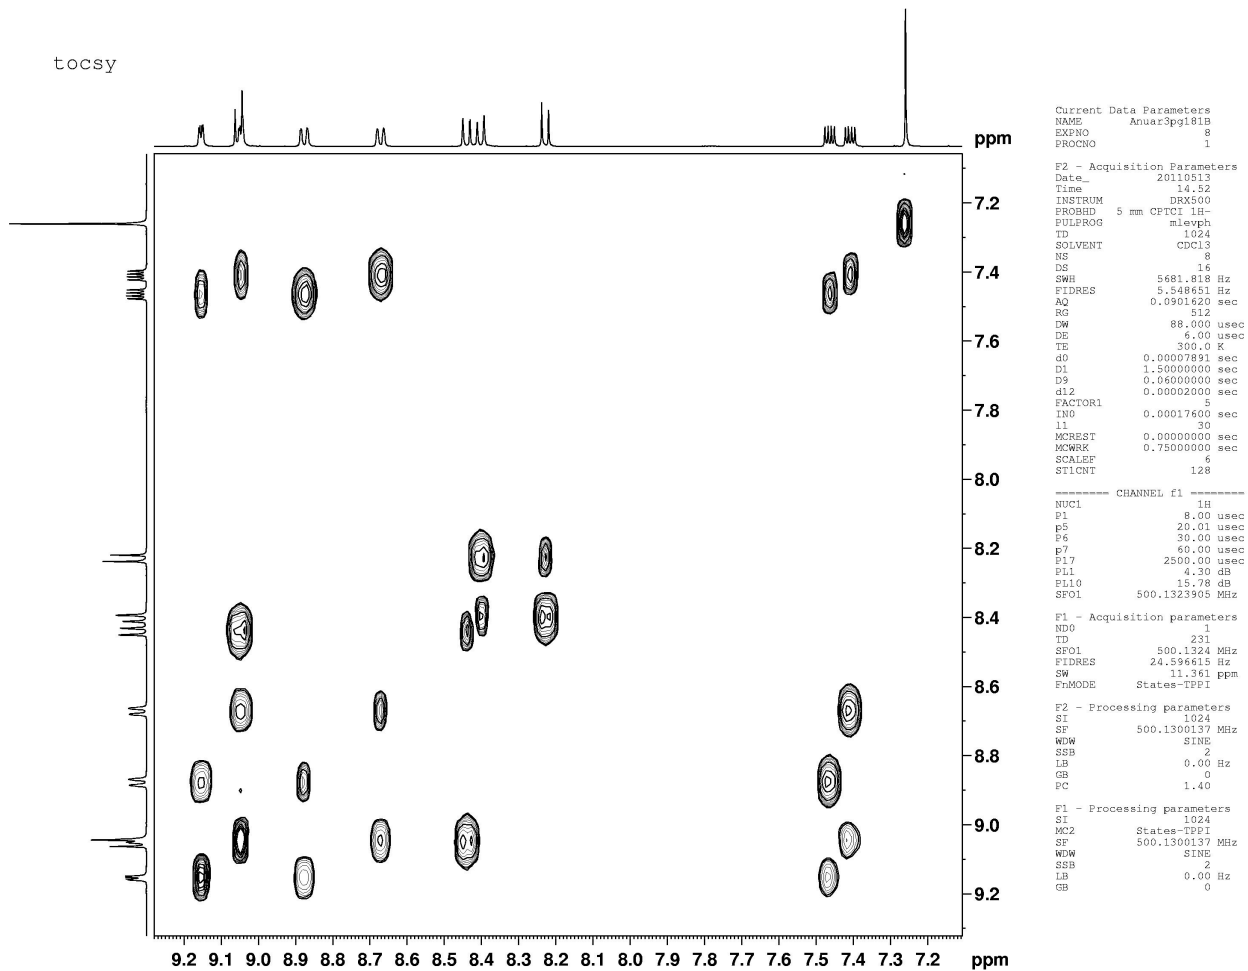

Figure S8.  $^1\text{H}$ - $^1\text{H}$  TOCSY of **4** ( $\text{CDCl}_3$ , 500 MHz).







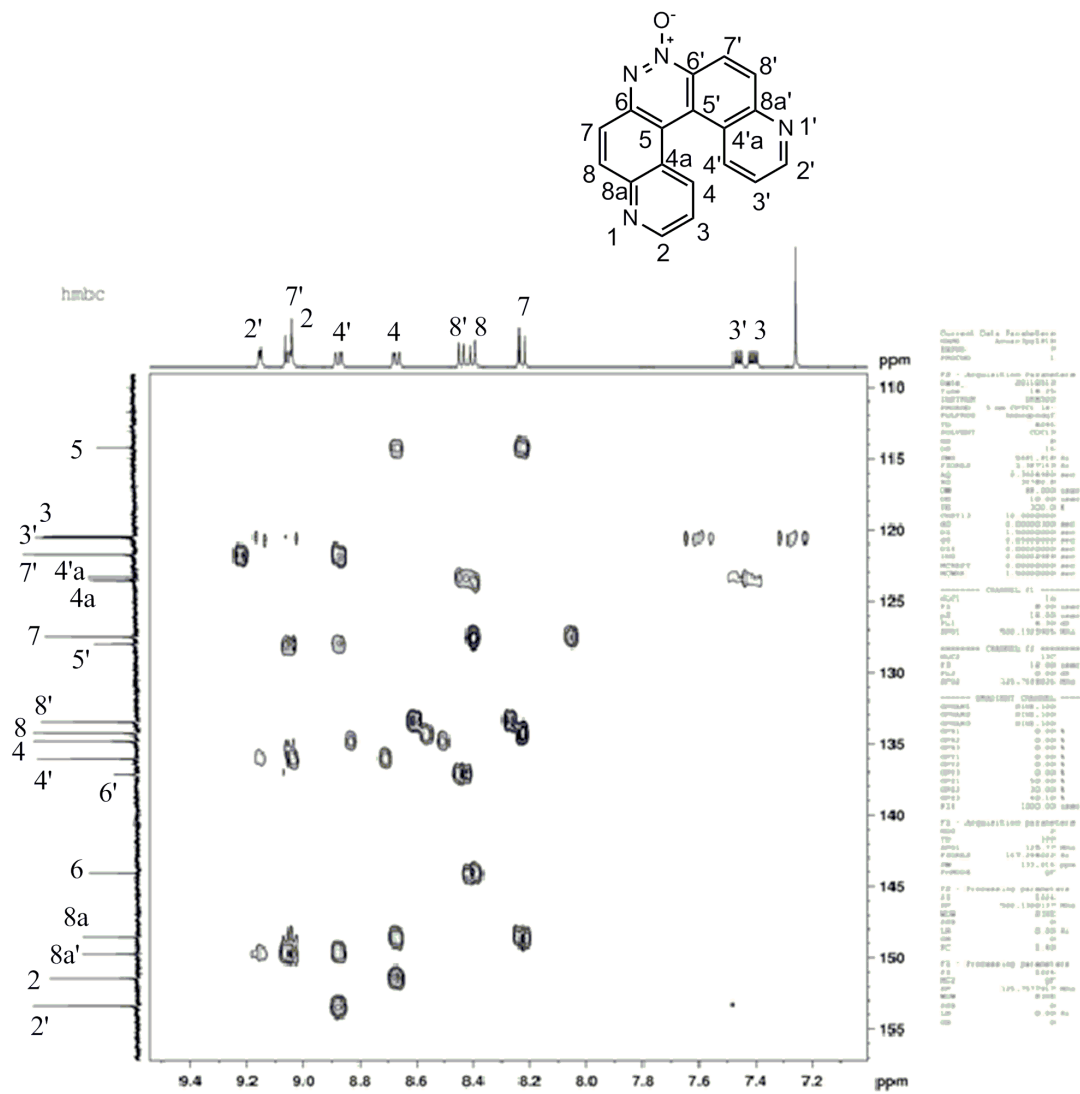

Figure S11.  $^1\text{H}$ - $^{13}\text{C}$  HMBC of 4 ( $\text{CDCl}_3$ ).

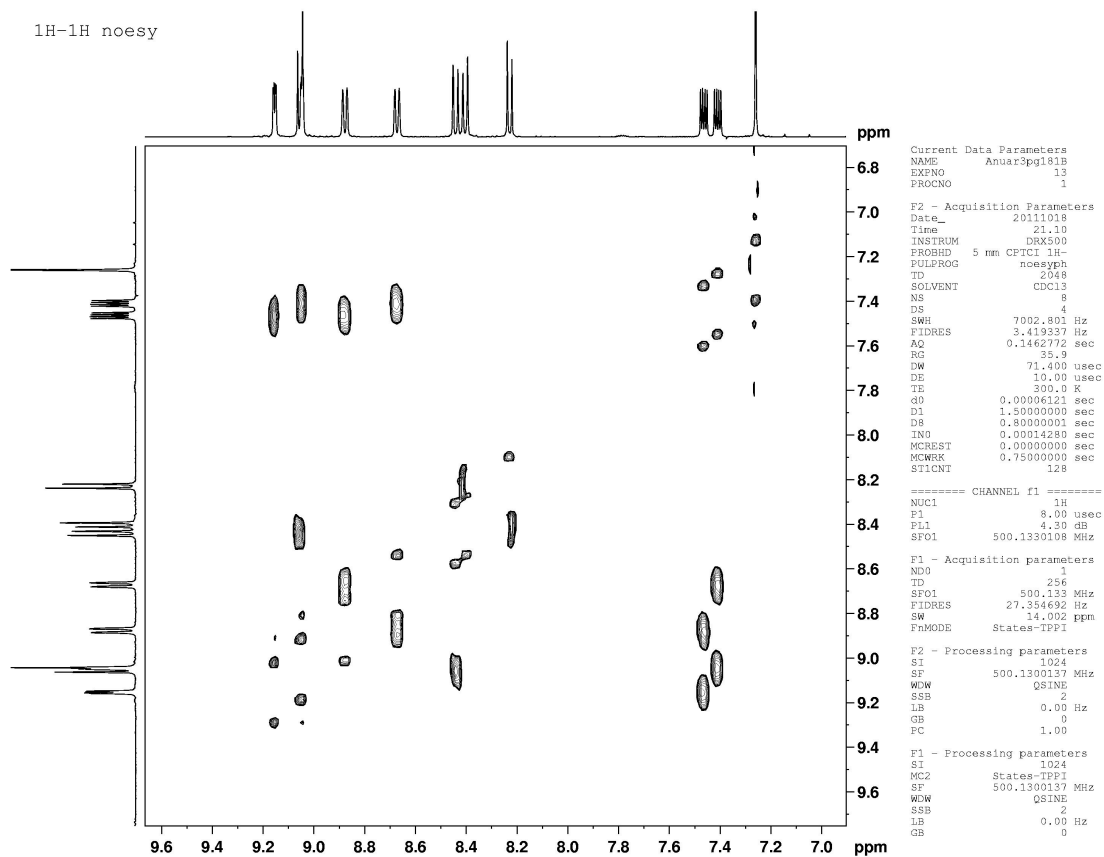

Figure S12.  $^1\text{H}$ - $^1\text{H}$  NOESY of **4** ( $\text{CDCl}_3$ , 500 MHz).

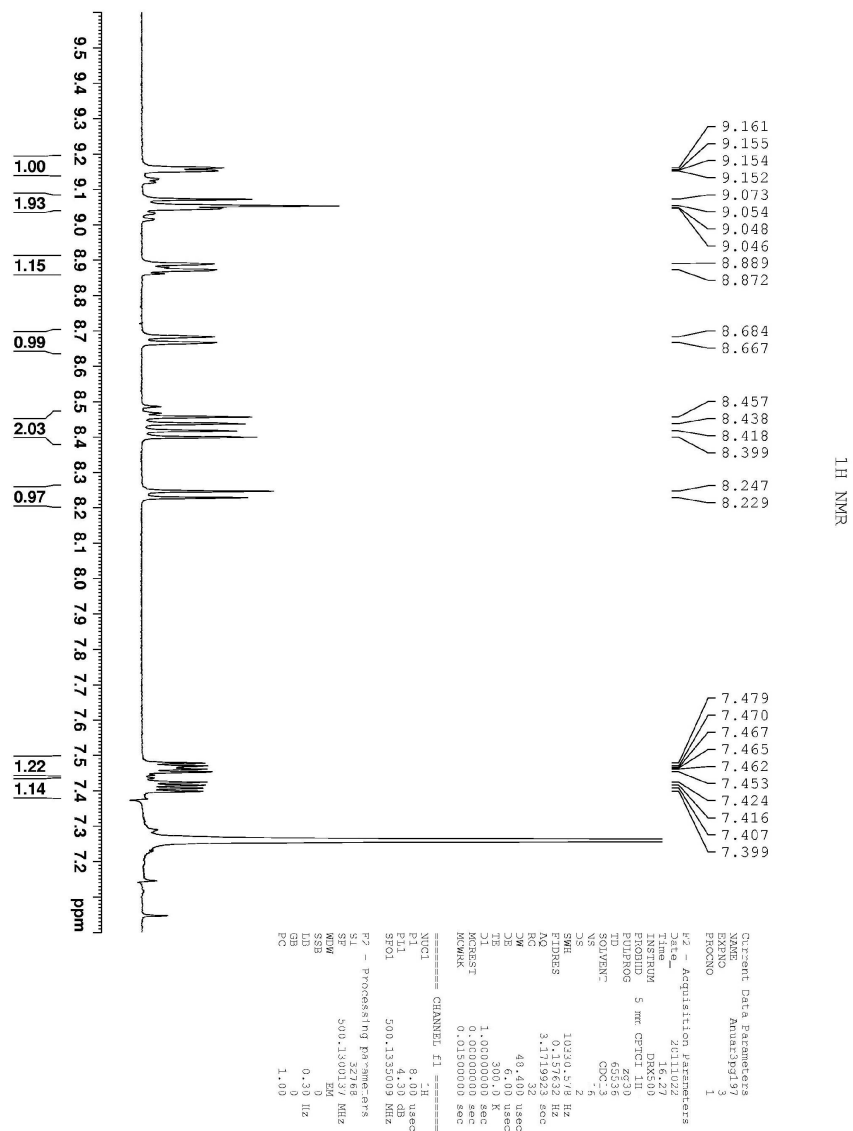

**Figure S13.**  $^1\text{H}$  NMR of **4** ( $\text{CDCl}_3$ , 500 MHz), obtained from NADPH and NADPH:cytochrome P450 reductase-mediated synthesis.

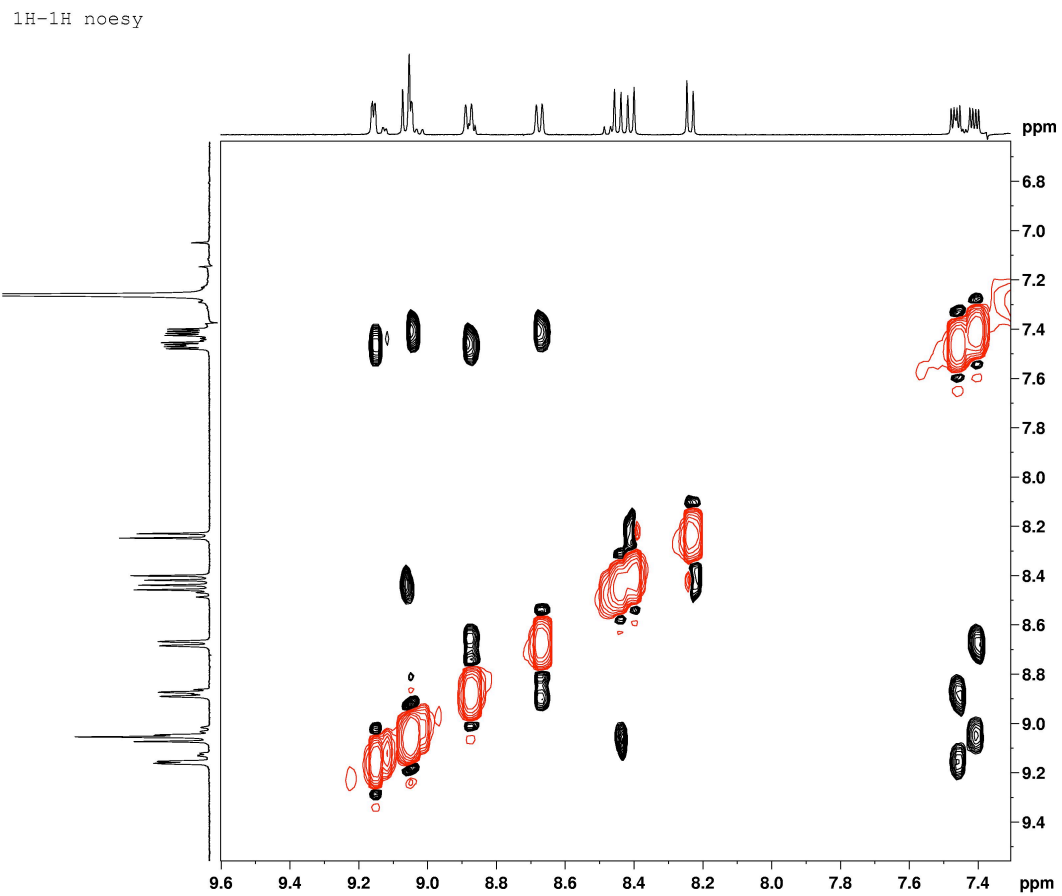

**Figure S14.**  $^1\text{H}$ - $^1\text{H}$  NOESY of **4** ( $\text{CDCl}_3$ , 500 MHz), obtained from NADPH and NADPH:cytochrome P450 reductase-mediated synthesis.
